# Supplementary material for: Phytochemistry, Pharmacology and Mode of Action of the Anti-Bacterial Artemisia Plants
Source: MDPI journal article supplement (doi:10.3390/bioengineering10060633), 2023-05-23
Supplement: s1 [file s1]

## Phytochemistry, pharmacology and mode of action of the anti-bacterial Artemisia plants

Khotibul Umam<sup>1,2,3,4</sup>, Ching-Shan Feng<sup>1</sup>, Greta Yang<sup>1</sup>, Ping-Chen Tu<sup>5</sup>, Chih-Yu Lin<sup>1</sup>, Meng-Ting Yang<sup>1</sup>, Tien-Fen Kuo<sup>1</sup>, Wen-Chin Yang<sup>1,2,3,6,7\*</sup>, and Hieu Tran Nguyen Minh<sup>1\*</sup>

### Supplementary Materials

**Table S1.** Degree of anti-bacterial activity of different compounds based on the MIC value against pathogens (modified from [61]).

| Activity           | MIC (μg/ml)    |
|--------------------|----------------|
| Very high activity | ≤ 40           |
| High activity      | < 40 to ≤ 80   |
| Moderate activity  | < 80 to ≤ 160  |
| Low activity       | < 160 to ≤ 300 |
| Very low activity  | > 300          |

**Table S2.** Ranking of the anti-bacterial activity of the 75 compounds based on the MIC value against pathogens.

| Ranking            | Compounds                                                                                                                                                                                                                                                                                                                                                                     |
|--------------------|-------------------------------------------------------------------------------------------------------------------------------------------------------------------------------------------------------------------------------------------------------------------------------------------------------------------------------------------------------------------------------|
| Very high          | phytol (46), α-amyrin (47), betulinic acid (48), acacetin (50), 12α,4α-dihydroxybishopsolicapolide (39), scopoletin (61), chrysoplenol B (54), jaceosidin (59), jaceidine (60), vulgarone B sesquiterpenoid (34), (Z)-2-(Hexa-2,4-diyn-1-ylidene)-1,6-dioxaspiro(4.5)dec-3-ene (68), (E)-2-(Hexa-2,4-diyn-1-ylidene)-1,6-dioxaspiro(4.5)dec-3-ene (69), dehydroleucodine (38) |
| High-Very high     | nerol (20)                                                                                                                                                                                                                                                                                                                                                                    |
| Moderate-Very high | artemisia ketone (18), sabinene (1), germacrene B (16), p-cymene (5), germacrene D (17)                                                                                                                                                                                                                                                                                       |
| Low-Very high      | α-elemene (11), α-pinene (9), β-pinene (10), α-farnesene (13), carveol (26)                                                                                                                                                                                                                                                                                                   |
| Very low-Very high | α-farnesene (13), 1,8-cineole/ eucalyptol (28), methyl linolenate (72), diisooctyl phthalate (66), camphor (33),                                                                                                                                                                                                                                                              |

|                                    |                                                                                                                                                                                                                                                                                                                                                                                                                                                                                                                                                             |
|------------------------------------|-------------------------------------------------------------------------------------------------------------------------------------------------------------------------------------------------------------------------------------------------------------------------------------------------------------------------------------------------------------------------------------------------------------------------------------------------------------------------------------------------------------------------------------------------------------|
|                                    | ursolic acid (49), $\beta$ -caryophyllene (12), $\alpha$ -terpineol (24), (+)-borneol (31), limonene (6 & 7)                                                                                                                                                                                                                                                                                                                                                                                                                                                |
| High                               | thymol (25)                                                                                                                                                                                                                                                                                                                                                                                                                                                                                                                                                 |
| Moderate-high                      | integracid (67), capillin (64)                                                                                                                                                                                                                                                                                                                                                                                                                                                                                                                              |
| Low-High                           | camphene (8), zerumbone sesquiterpenoid (37)                                                                                                                                                                                                                                                                                                                                                                                                                                                                                                                |
| Very low-High                      | (Z)-chrysanthenyl acetate (27), terpinen-4-ol (23)                                                                                                                                                                                                                                                                                                                                                                                                                                                                                                          |
| Moderate                           | piperitone (22), artemisinin (44), estragole (73), (+)-( <i>S</i> )-dihydro- <i>ar</i> -turmerone (36)                                                                                                                                                                                                                                                                                                                                                                                                                                                      |
| Low-Moderate                       | ponticaepoxide (70), $\alpha$ -curcumene (14), (+)-( <i>S</i> )- <i>ar</i> -turmerone sesquiterpenoid (35), grandisol (21)                                                                                                                                                                                                                                                                                                                                                                                                                                  |
| Very low-Moderate                  | myrcene (2), $\alpha$ -thujone (29), $\beta$ -thujone (30), dihydro- <i>ar</i> -curcumene (15), ( <i>E</i> )- $\beta$ -ocimene (3), ( <i>Z</i> )- $\beta$ -ocimene (4)                                                                                                                                                                                                                                                                                                                                                                                      |
| Very low-low                       | eugenol (75), (-) borneol (32)                                                                                                                                                                                                                                                                                                                                                                                                                                                                                                                              |
| Low                                | chrysosplenol D (55), linalool (19)                                                                                                                                                                                                                                                                                                                                                                                                                                                                                                                         |
| Very low                           | artesanate (45), (+)- <i>threo</i> -(5 <i>E</i> )-trideca-1,5- dien-7,9,11-triyn-3,4-diol (71), casticin (51), 2,4-dihydroxy-6-methoxyacetophenone (63), rosmarinic acid (74)                                                                                                                                                                                                                                                                                                                                                                               |
| No ranking (no assessment of MICs) | chrysosplenetin (52), chrysoeriol (53), penduletin (56), artemetin (57), pachypodol (58); 1,3,8-trihydroxyeudesm-4-en-7 $\alpha$ ,11 $\beta$ <i>H</i> -12,6 $\alpha$ -olide (40); 3 $\alpha$ ,8 $\beta$ -dihydroxygermacr-4(15),9(10)-dien-7 $\beta$ ,11 $\alpha$ <i>H</i> ,12,6 $\alpha$ -olide (41); 1 $\beta$ ,8 $\alpha$ -dihydroxy-11 $\alpha$ ,13-dihydrobalchanin (42); 11-epiartapshin (43); 5- $\beta$ -D-glucopyranosyloxy-7-methoxy-6 <i>H</i> -benzopyran-2-one (62); benzoic acid, <i>p</i> -( $\beta$ -D-glucopyranosyloxy)-methyl ester (65) |
